# Supplementary material
Source: PubMed Central journal article supplement (PMC9255932)
Supplement: gbab101_suppl_supplementary_material.pdf [file gbab101_suppl_supplementary_material.pdf]

Emotional, social, and existential loneliness before and during the COVID-19 pandemic:  
Prevalence and risk factors among Dutch older adults

Supplementary Material

Theo G. van Tilburg, PhD

Dept. of Sociology, Vrije Universiteit Amsterdam

Theo.van.Tilburg@vu.nl

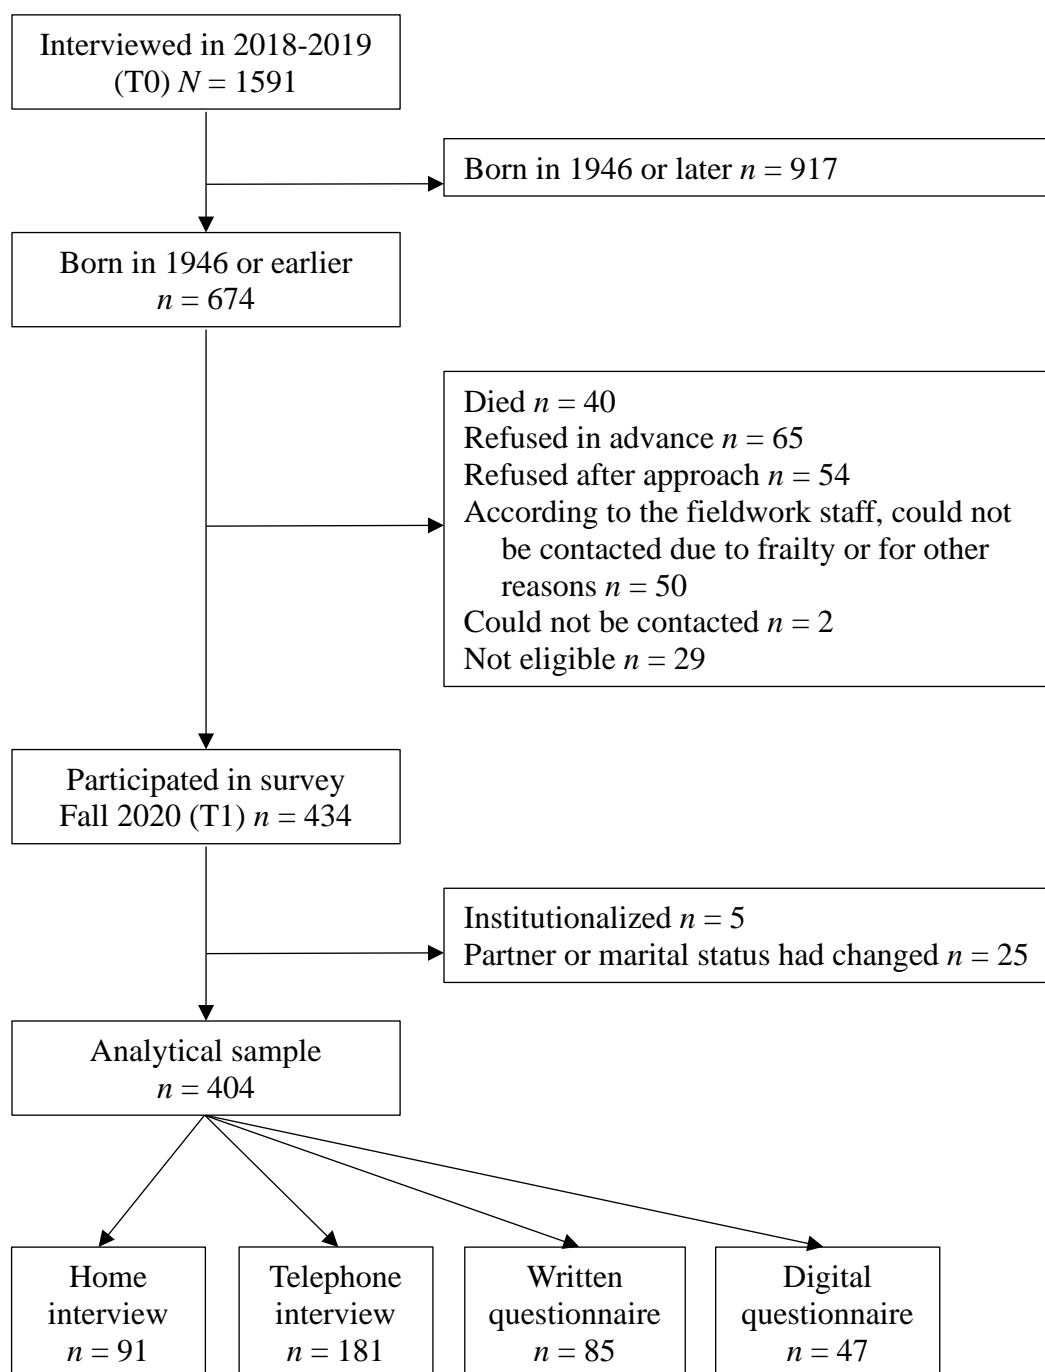

Figure S1. Flow chart summarizing the selection of respondents

Notes. Interviews at T0 were between October 11, 2018, and October 21, 2019; the mean interview date was February 15. Data collection at T1 was between September 23, 2020, and January 18, 2021; the mean response date was November 8.

Table S1. Factor loadings for loneliness items

|                                                                                                        |      |
|--------------------------------------------------------------------------------------------------------|------|
| Emotional loneliness                                                                                   |      |
| If we were to classify people into not ... very strongly lonely. what would you attribute yourself to? | 0.93 |
| I sometimes feel lonely                                                                                | 0.94 |
| During the past week I felt lonely                                                                     | 0.90 |
| I miss having a really close friend                                                                    | 0.71 |
| I experience a general sense of emptiness                                                              | 0.89 |
| I miss the pleasure of the company of others                                                           | 0.87 |
| I find my circle of friends and acquaintances too limited                                              | 0.79 |
| I miss having people around me                                                                         | 0.88 |
| I often feel rejected                                                                                  | 0.84 |
| Social loneliness                                                                                      |      |
| There is always someone I can talk to about my day-to-day problems †                                   | 0.76 |
| There are plenty of people I can lean on when I have problems †                                        | 0.83 |
| There are many people I can trust completely †                                                         | 0.73 |
| There are enough people I feel close to †                                                              | 0.85 |
| I can call on my friends whenever I need them †                                                        | 0.81 |
| Existential loneliness                                                                                 |      |
| I am happy with the way I have lived my life †                                                         | 0.51 |
| There is a purpose to my life †                                                                        | 0.32 |
| I feel helpless                                                                                        | 0.87 |
| I feel at the mercy of the world                                                                       | 0.44 |
| I feel dead                                                                                            | 0.90 |
| The universe is full of meaning †                                                                      | 0.44 |
| I feel that there is little point to life                                                              | 0.65 |

Notes.  $N = 404$ . Scores are reversed for positively phrased items marked with †. Items are dichotomous. Fit for the three-factor model: RMSEA = .046, CFI = .972. Emotional factor scores correlate 0.64 and 0.71 with social and existential factor scores, respectively; social correlates 0.69 with existential.

Table S2. General linear modelling (repeated measures) of loneliness factor scores

|             | Within and between respondents effects |                  |          |                    | Estimated marginal means         |      |      |      |                             |      |      |      |       |      |      |      |
|-------------|----------------------------------------|------------------|----------|--------------------|----------------------------------|------|------|------|-----------------------------|------|------|------|-------|------|------|------|
|             | Observation                            |                  | Mode     | Observation * Mode | Written or digital questionnaire |      |      |      | Home or telephone interview |      |      |      | All   |      |      |      |
|             | <i>F</i>                               | partial $\eta^2$ | <i>F</i> | <i>F</i>           | T0                               |      | T1   |      | T0                          |      | T1   |      | T0    | T1   |      |      |
|             |                                        |                  |          |                    | M                                | SE   | M    | SE   | M                           | SE   | M    | SE   | M     | SE   |      |      |
| Emotional   | 95.4 ***                               | 0.19             | 6.9 **   | 0.7                | -0.14                            | 0.06 | 0.15 | 0.06 | 0.07                        | 0.04 | 0.31 | 0.04 | -0.03 | 0.03 | 0.23 | 0.04 |
| Social      | 59.5 ***                               | 0.13             | 0.0      | 17.3 ***           | -0.05                            | 0.05 | 0.25 | 0.05 | 0.06                        | 0.03 | 0.15 | 0.03 | 0.00  | 0.03 | 0.20 | 0.03 |
| Existential | 47.6 ***                               | 0.11             | 1.8      | 7.1 **             | -0.04                            | 0.03 | 0.11 | 0.03 | 0.05                        | 0.02 | 0.12 | 0.02 | 0.01  | 0.02 | 0.11 | 0.02 |

Notes.  $N = 404$ . Written or digital questionnaire,  $n = 132$ ; home or telephone interview,  $n = 272$ . Covariates are length of the interval T0-T1 and variation in T1 interview date (effects not shown). Based on Cohen's (1988)  $f$ ,  $\eta^2 = 0.01$  indicates a small effect;  $\eta^2 = 0.06$  indicates a medium effect;  $\eta^2 = 0.14$  indicates a large effect.

\*  $p < .05$ ; \*\*  $p < .01$ ; \*\*\*  $p < .001$ .

Table S3. Generalized estimating equations regression of item scores: model effects and parameter estimates

|                                                                                                        | Within and between respondents model |                  |                                   |                     |           |                            |
|--------------------------------------------------------------------------------------------------------|--------------------------------------|------------------|-----------------------------------|---------------------|-----------|----------------------------|
|                                                                                                        | effects                              |                  |                                   | Parameter estimates |           |                            |
|                                                                                                        | Observation<br>$\chi^2$              | Mode<br>$\chi^2$ | Observation<br>* Mode<br>$\chi^2$ | Observation<br>B    | Mode<br>B | Observation<br>* Mode<br>B |
| <b>Emotional loneliness</b>                                                                            |                                      |                  |                                   |                     |           |                            |
| If we were to classify people into not ... very strongly lonely, what would you attribute yourself to? | 3.8                                  | 3.0              | 0.1                               | 0.185               | 0.339     | 0.087                      |
| I sometimes feel lonely                                                                                | 13.6 ***                             | 7.1 **           | 0.3                               | 0.342               | 0.522 *   | 0.119                      |
| During the past week I felt lonely                                                                     | 3.4                                  | 10.7 **          | 1.6                               | 0.501               | 0.995 **  | -0.406                     |
| I miss having a really close friend                                                                    | 2.1                                  | 0.2              | 3.7                               | 0.442 *             | 0.359     | -0.504                     |
| I experience a general sense of emptiness                                                              | 17.4 ***                             | 8.1 **           | 1.3                               | 0.830 **            | 0.895 **  | -0.361                     |
| I miss the pleasure of the company of others                                                           | 69.8 ***                             | 4.1 *            | 0.4                               | 1.037 ***           | 0.351     | 0.162                      |
| Not living with partner, no daily contact with others                                                  | 11.0 ***                             | 0.0              | 1.1                               | 0.566               | -0.183    | 0.523                      |
| Not living with partner, daily contact with others                                                     | 8.1 **                               | 0.1              | 0.9                               | 0.498               | -0.092    | 0.512                      |
| Living with partner                                                                                    | 42.2 ***                             | 3.2              | 0.7                               | 2.306 ***           | 0.984     | -0.547                     |
| I find my circle of friends and acquaintances too limited                                              | 36.6 ***                             | 0.5              | 0.0                               | 0.731 ***           | 0.140     | 0.027                      |
| I miss having people around me                                                                         | 54.6 ***                             | 7.8 **           | 0.3                               | 0.945 ***           | 0.538     | 0.143                      |
| Not living with partner, no daily contact with others                                                  | 20.7 ***                             | 0.1              | 0.2                               | 0.992 *             | 0.012     | 0.242                      |
| Not living with partner, daily contact with others                                                     | 10.4 **                              | 0.6              | 0.0                               | 1.057 *             | 0.399     | -0.134                     |
| Living with partner                                                                                    | 25.7 ***                             | 4.7 *            | 0.2                               | 1.153 **            | 0.655     | 0.199                      |
| I often feel rejected                                                                                  | 15.4 ***                             | 0.0              | 4.1 *                             | 1.517 ***           | 0.491     | -1.034 *                   |
| <b>Social loneliness</b>                                                                               |                                      |                  |                                   |                     |           |                            |
| There is always someone I can talk to about my day-to-day problems †                                   | 15.8 ***                             | 0.9              | 10.6 **                           | 1.396 ***           | 0.881 *   | -1.258 **                  |
| There are plenty of people I can lean on when I have problems †                                        | 7.0 **                               | 1.3              | 3.7                               | 0.834 **            | 0.069     | -0.703                     |
| There are many people I can trust completely †                                                         | 9.5 **                               | 1.1              | 2.1                               | 0.588 **            | -0.011    | -0.378                     |
| There are enough people I feel close to †                                                              | 7.7 **                               | 0.0              | 3.4                               | 0.687 **            | 0.298     | -0.548                     |
| I can call on my friends whenever I need them †                                                        | 23.3 ***                             | 0.6              | 10.2 **                           | 1.272 ***           | 0.325     | -1.013 **                  |
| <b>Existential loneliness</b>                                                                          |                                      |                  |                                   |                     |           |                            |
| I am happy with the way I have lived my life †                                                         | 0.8                                  | 0.1              | 0.0                               | 0.191               | 0.104     | -0.070                     |
| There is a purpose to my life †                                                                        | 0.4                                  | 3.2              | 3.3                               | 0.268               | -0.156    | -0.396                     |
| I feel helpless                                                                                        | 2.5                                  | 0.4              | 0.8                               | 0.165               | 0.029     | 0.441                      |
| I feel at the mercy of the world                                                                       | 1.3                                  | 2.8              | 8.5 **                            | 0.227               | 0.702 **  | -0.735 **                  |
| I feel dead                                                                                            | 1.1                                  | 0.3              |                                   | 0.522               | 0.334     |                            |
| The universe is full of meaning †                                                                      | 6.3 *                                | 0.7              | 5.0 *                             | 0.631 **            | 0.129     | -0.594 *                   |
| I feel that there is little point to life                                                              | 0.0                                  | 0.0              | 0.0                               | 0.000               | 0.022     | 0.000                      |

Notes.  $N = 404$ . Not living with partner, no daily contact with others,  $n = 86$ ; not living with partner, daily contact with others,  $n = 87$ ; living with partner,  $n = 231$ . Scores are reversed for positively phrased items marked with †. Items are dichotomous. Covariates are length of the interval T0-T1 and variation in T1 interview date (model effects and parameter estimates not shown). For the item "I feel dead," the convergence criteria for the interaction model were not met.

\*  $p < .05$ ; \*\*  $p < .01$ ; \*\*\*  $p < .001$ .

Table S4. Generalized estimating equations regression of item scores: estimated marginal means

|                                                                                                        | Written or digital questionnaire |      |      |      | Home or telephone interview |      |      |      | All  |      |      |      | <i>d</i> |
|--------------------------------------------------------------------------------------------------------|----------------------------------|------|------|------|-----------------------------|------|------|------|------|------|------|------|----------|
|                                                                                                        | T0                               |      | T1   |      | T0                          |      | T1   |      | T0   |      | T1   |      |          |
|                                                                                                        | M                                | SE   | M    | SE   | M                           | SE   | M    | SE   | M    | SE   | M    | SE   |          |
| Emotional loneliness                                                                                   |                                  |      |      |      |                             |      |      |      |      |      |      |      |          |
| If we were to classify people into not ... very strongly lonely, what would you attribute yourself to? | 0.20                             | 0.04 | 0.24 | 0.04 | 0.26                        | 0.03 | 0.32 | 0.03 | 0.23 | 0.02 | 0.28 | 0.02 | 0.10     |
| I sometimes feel lonely                                                                                | 0.20                             | 0.03 | 0.27 | 0.04 | 0.30                        | 0.03 | 0.41 | 0.03 | 0.25 | 0.02 | 0.33 | 0.03 | 0.19     |
| During the past week I felt lonely                                                                     | 0.11                             | 0.03 | 0.18 | 0.03 | 0.26                        | 0.03 | 0.28 | 0.03 | 0.17 | 0.02 | 0.22 | 0.02 | 0.28     |
| I miss having a really close friend                                                                    | 0.19                             | 0.03 | 0.26 | 0.04 | 0.25                        | 0.03 | 0.24 | 0.03 | 0.21 | 0.02 | 0.25 | 0.02 | 0.24     |
| I experience a general sense of emptiness                                                              | 0.09                             | 0.02 | 0.19 | 0.03 | 0.20                        | 0.03 | 0.29 | 0.03 | 0.14 | 0.02 | 0.24 | 0.02 | 0.46     |
| I miss the pleasure of the company of others                                                           | 0.16                             | 0.03 | 0.35 | 0.04 | 0.22                        | 0.03 | 0.48 | 0.03 | 0.19 | 0.02 | 0.41 | 0.03 | 0.57     |
| Not living with partner, no daily contact with others                                                  | 0.42                             | 0.11 | 0.56 | 0.10 | 0.38                        | 0.06 | 0.64 | 0.06 | 0.40 | 0.06 | 0.60 | 0.06 | 0.31     |
| Not living with partner, daily contact with others                                                     | 0.37                             | 0.10 | 0.50 | 0.10 | 0.35                        | 0.06 | 0.60 | 0.07 | 0.36 | 0.06 | 0.55 | 0.06 | 0.28     |
| Living with partner                                                                                    | 0.03                             | 0.02 | 0.26 | 0.05 | 0.08                        | 0.02 | 0.35 | 0.04 | 0.05 | 0.02 | 0.30 | 0.03 | 1.27     |
| I find my circle of friends and acquaintances too limited                                              | 0.20                             | 0.03 | 0.33 | 0.04 | 0.22                        | 0.03 | 0.37 | 0.03 | 0.21 | 0.02 | 0.35 | 0.03 | 0.40     |
| I miss having people around me                                                                         | 0.14                             | 0.03 | 0.30 | 0.04 | 0.22                        | 0.03 | 0.46 | 0.03 | 0.18 | 0.02 | 0.38 | 0.03 | 0.52     |
| Not living with partner, no daily contact with others                                                  | 0.28                             | 0.09 | 0.51 | 0.11 | 0.28                        | 0.06 | 0.58 | 0.07 | 0.28 | 0.05 | 0.55 | 0.06 | 0.55     |
| Not living with partner, daily contact with others                                                     | 0.31                             | 0.10 | 0.56 | 0.10 | 0.40                        | 0.06 | 0.62 | 0.06 | 0.35 | 0.06 | 0.59 | 0.06 | 0.58     |
| Living with partner                                                                                    | 0.06                             | 0.02 | 0.17 | 0.04 | 0.11                        | 0.02 | 0.33 | 0.04 | 0.08 | 0.02 | 0.24 | 0.03 | 0.64     |
| I often feel rejected                                                                                  | 0.04                             | 0.02 | 0.15 | 0.03 | 0.06                        | 0.01 | 0.09 | 0.02 | 0.05 | 0.01 | 0.12 | 0.02 | 0.84     |
| Social loneliness                                                                                      |                                  |      |      |      |                             |      |      |      |      |      |      |      |          |
| There is always someone I can talk to about my day-to-day problems †                                   | 0.07                             | 0.02 | 0.23 | 0.04 | 0.15                        | 0.02 | 0.17 | 0.02 | 0.10 | 0.02 | 0.20 | 0.02 | 0.77     |
| There are plenty of people I can lean on when I have problems †                                        | 0.11                             | 0.03 | 0.23 | 0.04 | 0.12                        | 0.02 | 0.14 | 0.02 | 0.12 | 0.02 | 0.18 | 0.02 | 0.46     |
| There are many people I can trust completely †                                                         | 0.28                             | 0.04 | 0.41 | 0.04 | 0.28                        | 0.03 | 0.32 | 0.03 | 0.28 | 0.02 | 0.37 | 0.03 | 0.32     |
| There are enough people I feel close to †                                                              | 0.15                             | 0.03 | 0.25 | 0.04 | 0.19                        | 0.02 | 0.21 | 0.02 | 0.17 | 0.02 | 0.23 | 0.02 | 0.38     |
| I can call on my friends whenever I need them †                                                        | 0.14                             | 0.03 | 0.36 | 0.04 | 0.18                        | 0.02 | 0.22 | 0.03 | 0.16 | 0.02 | 0.28 | 0.02 | 0.70     |
| Existential loneliness                                                                                 |                                  |      |      |      |                             |      |      |      |      |      |      |      |          |
| I am happy with the way I have lived my life †                                                         | 0.13                             | 0.03 | 0.15 | 0.03 | 0.14                        | 0.02 | 0.16 | 0.02 | 0.14 | 0.02 | 0.16 | 0.02 | 0.11     |
| There is a purpose to my life †                                                                        | 0.44                             | 0.05 | 0.51 | 0.05 | 0.41                        | 0.03 | 0.38 | 0.03 | 0.43 | 0.03 | 0.44 | 0.03 | 0.15     |
| I feel helpless                                                                                        | 0.04                             | 0.02 | 0.05 | 0.02 | 0.04                        | 0.01 | 0.08 | 0.02 | 0.04 | 0.01 | 0.06 | 0.01 | 0.09     |
| I feel at the mercy of the world                                                                       | 0.29                             | 0.04 | 0.33 | 0.04 | 0.45                        | 0.03 | 0.33 | 0.03 | 0.36 | 0.03 | 0.33 | 0.03 | 0.13     |
| I feel dead                                                                                            |                                  |      |      |      |                             |      |      |      | 0.01 | 0.01 | 0.02 | 0.01 | 0.29     |
| The universe is full of meaning †                                                                      | 0.26                             | 0.04 | 0.39 | 0.04 | 0.28                        | 0.03 | 0.29 | 0.03 | 0.27 | 0.02 | 0.34 | 0.03 | 0.35     |
| I feel that there is little point to life                                                              | 0.10                             | 0.03 | 0.10 | 0.03 | 0.11                        | 0.02 | 0.11 | 0.02 | 0.11 | 0.02 | 0.11 | 0.02 | 0.00     |

Notes.  $N = 404$ . Written or digital questionnaire,  $n = 132$ ; home or telephone interview,  $n = 272$ . Not living with partner, no daily contact with others,  $n = 86$ ; not living with partner, daily contact with others,  $n = 87$ ; living with partner,  $n = 231$ . Scores are reversed for positively phrased items marked with †. Items are dichotomous. For the item "I feel dead," the convergence criteria for the interaction model were not met. Effect size  $d$  is computed as the unstandardized regression coefficient (presented in Table S3) divided by 1.81 (Chinn, 2000). Cohen's (1988)  $d = 0.2$  is a small effect, 0.5 is a medium effect and 0.8 is a large effect.

Table S5. Correlations between variables included in the regression analysis (N = 404; after imputation of missing values)

|                                    | Emotional T1 | Social T1 | Existential T1 | Emotional T0 | Social T0 | Existential T0 | Living with partner T0 | Network size T0 | Daily contacted network member T0 | Social participation frequency T0 | Church attendance frequency T0 | Mastery T0 | Self-esteem T0 | Number of chronic diseases T0 | Physical functioning T0 | Level of urbanity T0 | Education level (years) | Income T0 | Age T0 | Female | Interval T0-T1 (years) | Variation interview date T1 (days) | Oral interview T1 |  |
|------------------------------------|--------------|-----------|----------------|--------------|-----------|----------------|------------------------|-----------------|-----------------------------------|-----------------------------------|--------------------------------|------------|----------------|-------------------------------|-------------------------|----------------------|-------------------------|-----------|--------|--------|------------------------|------------------------------------|-------------------|--|
| Emotional T1                       | 1            |           |                |              |           |                |                        |                 |                                   |                                   |                                |            |                |                               |                         |                      |                         |           |        |        |                        |                                    |                   |  |
| Social T1                          | 0.747        | 1         |                |              |           |                |                        |                 |                                   |                                   |                                |            |                |                               |                         |                      |                         |           |        |        |                        |                                    |                   |  |
| Existential T1                     | 0.846        | 0.837     | 1              |              |           |                |                        |                 |                                   |                                   |                                |            |                |                               |                         |                      |                         |           |        |        |                        |                                    |                   |  |
| Emotional T0                       | 0.728        | 0.583     | 0.629          | 1            |           |                |                        |                 |                                   |                                   |                                |            |                |                               |                         |                      |                         |           |        |        |                        |                                    |                   |  |
| Social T0                          | 0.538        | 0.620     | 0.548          | 0.726        | 1         |                |                        |                 |                                   |                                   |                                |            |                |                               |                         |                      |                         |           |        |        |                        |                                    |                   |  |
| Existential T0                     | 0.629        | 0.615     | 0.670          | 0.838        | 0.832     | 1              |                        |                 |                                   |                                   |                                |            |                |                               |                         |                      |                         |           |        |        |                        |                                    |                   |  |
| Living with partner T0             | -0.415       | -0.254    | -0.325         | -0.423       | -0.241    | -0.341         | 1                      |                 |                                   |                                   |                                |            |                |                               |                         |                      |                         |           |        |        |                        |                                    |                   |  |
| Network size T0                    | -0.080       | -0.217    | -0.161         | -0.141       | -0.250    | -0.229         | 0.096                  | 1               |                                   |                                   |                                |            |                |                               |                         |                      |                         |           |        |        |                        |                                    |                   |  |
| Daily contacted network member T0  | 0.233        | 0.116     | 0.148          | 0.244        | 0.064     | 0.138          | -0.608                 | -0.100          | 1                                 |                                   |                                |            |                |                               |                         |                      |                         |           |        |        |                        |                                    |                   |  |
| Social participation frequency T0  | -0.109       | -0.159    | -0.152         | -0.118       | -0.134    | -0.190         | 0.083                  | 0.219           | -0.092                            | 1                                 |                                |            |                |                               |                         |                      |                         |           |        |        |                        |                                    |                   |  |
| Church attendance frequency T0     | 0.077        | -0.048    | -0.030         | 0.007        | -0.027    | -0.080         | 0.007                  | 0.113           | -0.009                            | 0.365                             | 1                              |            |                |                               |                         |                      |                         |           |        |        |                        |                                    |                   |  |
| Mastery T0                         | -0.345       | -0.320    | -0.364         | -0.307       | -0.274    | -0.377         | 0.120                  | 0.088           | -0.047                            | -0.049                            | -0.138                         | 1          |                |                               |                         |                      |                         |           |        |        |                        |                                    |                   |  |
| Self-esteem T0                     | -0.306       | -0.303    | -0.343         | -0.342       | -0.325    | -0.411         | 0.136                  | 0.047           | 0.003                             | 0.013                             | -0.094                         | 0.497      | 1              |                               |                         |                      |                         |           |        |        |                        |                                    |                   |  |
| Number of chronic diseases T0      | 0.189        | 0.182     | 0.214          | 0.177        | 0.132     | 0.213          | -0.082                 | -0.143          | 0.067                             | -0.106                            | 0.025                          | -0.228     | -0.204         | 1                             |                         |                      |                         |           |        |        |                        |                                    |                   |  |
| Physical functioning T0            | -0.307       | -0.272    | -0.322         | -0.268       | -0.239    | -0.320         | 0.156                  | 0.078           | -0.093                            | 0.154                             | 0.058                          | 0.313      | 0.330          | -0.382                        | 1                       |                      |                         |           |        |        |                        |                                    |                   |  |
| Level of urbanity T0               | 0.002        | -0.045    | 0.018          | 0.032        | 0.040     | 0.062          | -0.088                 | -0.085          | 0.024                             | -0.138                            | -0.189                         | 0.070      | 0.051          | -0.015                        | 0.007                   | 1                    |                         |           |        |        |                        |                                    |                   |  |
| Education level (years)            | -0.122       | -0.058    | -0.112         | -0.121       | -0.104    | -0.123         | 0.102                  | 0.208           | -0.136                            | 0.089                             | -0.134                         | 0.187      | 0.084          | -0.161                        | 0.195                   | 0.081                | 1                       |           |        |        |                        |                                    |                   |  |
| Income T0                          | 0.022        | 0.035     | -0.008         | 0.060        | 0.016     | 0.043          | -0.213                 | 0.053           | 0.044                             | 0.085                             | -0.070                         | 0.073      | 0.038          | -0.105                        | 0.097                   | 0.133                | 0.346                   | 1         |        |        |                        |                                    |                   |  |
| Age T0                             | 0.227        | 0.154     | 0.225          | 0.246        | 0.219     | 0.265          | -0.260                 | -0.071          | 0.166                             | -0.120                            | 0.056                          | -0.239     | -0.231         | 0.167                         | -0.414                  | 0.010                | -0.078                  | -0.023    | 1      |        |                        |                                    |                   |  |
| Female                             | 0.151        | 0.059     | 0.164          | 0.189        | 0.096     | 0.199          | -0.308                 | 0.078           | 0.113                             | 0.004                             | 0.064                          | -0.210     | -0.243         | 0.052                         | -0.148                  | 0.050                | -0.277                  | -0.124    | 0.095  | 1      |                        |                                    |                   |  |
| Interval T0-T1 (years)             | -0.107       | -0.065    | -0.108         | -0.130       | -0.072    | -0.080         | 0.012                  | -0.089          | 0.045                             | -0.027                            | -0.004                         | 0.035      | 0.068          | 0.003                         | 0.137                   | -0.145               | -0.074                  | -0.022    | -0.253 | -0.044 | 1                      |                                    |                   |  |
| Variation interview date T1 (days) | 0.066        | 0.028     | 0.073          | 0.056        | 0.029     | 0.042          | 0.016                  | 0.140           | -0.027                            | 0.065                             | 0.047                          | -0.061     | -0.132         | 0.024                         | -0.046                  | -0.003               | 0.001                   | -0.033    | 0.100  | 0.087  | -0.444                 | 1                                  |                   |  |
| Oral interview T1                  | 0.091        | -0.081    | -0.003         | 0.134        | 0.097     | 0.111          | -0.102                 | -0.023          | 0.046                             | 0.025                             | 0.078                          | -0.088     | -0.078         | 0.000                         | -0.060                  | 0.105                | -0.065                  | -0.017    | 0.057  | 0.112  | 0.038                  | -0.151                             | 1                 |  |

## References

- Chinn, S. (2000). A simple method for converting an odds ratio to effect size for use in meta-analysis. *Statistics in Medicine*, 19(22), 3127-3131. doi:10.1002/1097-0258(20001130)19:22<3127::AID-SIM784>3.0.CO;2-M
- Cohen, J. (1988). *Statistical power analysis for the behavioral sciences (second edition)*. Mahwah, NJ: Lawrence Erlbaum.
